# Supplementary material for: Recording of cellular physiological histories along optically readable self-assembling protein chains
Source: PubMed Central journal article supplement (PMC10188365; doi:10.1038/s41587-022-01586-7), 2023-01-02
Supplement: 41587_2022_1586_MOESM1_ESM.pdf [file 41587_2022_1586_MOESM1_ESM.pdf]

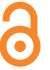

---

# Recording of cellular physiological histories along optically readable self-assembling protein chains

---

In the format provided by the authors and unedited

---

## Supplementary information

### Recording of cellular physiological histories along optically readable self-assembling protein chains

Changyang Linghu<sup>1,2,3,4</sup>, Bobae An<sup>1,2,3,4</sup>, Monika Shpokayte<sup>5,6</sup>, Orhan T. Celiker<sup>1,2,3,4</sup>, Nava Shmoel<sup>1,2,3,4</sup>, Ruihan Zhang<sup>1,2,3,4</sup>, Chi Zhang<sup>1,2,3,4</sup>, Demian Park<sup>1,2,3,4</sup>, Won Min Park<sup>7</sup>, Steve Ramirez<sup>6</sup> and Edward S. Boyden<sup>\*1,2,3,4,8,9,10,11</sup>

\*Email: [edboyden@mit.edu](mailto:edboyden@mit.edu)

<sup>1</sup>Brain and Cognitive Sciences, MIT, Cambridge, MA 02139

<sup>2</sup>Biological Engineering, MIT, Cambridge, MA 02139

<sup>3</sup>Media Arts and Sciences, MIT, Cambridge, MA 02139

<sup>4</sup>McGovern Institute, MIT, Cambridge, MA 02139

<sup>5</sup>Graduate Program for Neuroscience, Boston University, Boston, MA 02215

<sup>6</sup>Psychological and Brain Sciences, Boston University, Boston, MA 02215

<sup>7</sup>Chemical Engineering, Kansas State University, Manhattan, KS 66506

<sup>8</sup>Howard Hughes Medical Institute, MIT, Cambridge, MA 02139

<sup>9</sup>K Lisa Yang Center for Bionics, MIT, Cambridge, MA 02139

<sup>10</sup>Center for Neurobiological Engineering, MIT, Cambridge, MA 02139

<sup>11</sup>Koch Institute, MIT, Cambridge, MA 02139

## Supplementary Tables

**Supplementary Table 1** - sequences of protein motifs used in this study

| <b>Motif name</b>             | <b>Amino acid sequence</b>                                                                                                                                                                                                                                                                                                                                                                                                                  | <b>Reference</b> |
|-------------------------------|---------------------------------------------------------------------------------------------------------------------------------------------------------------------------------------------------------------------------------------------------------------------------------------------------------------------------------------------------------------------------------------------------------------------------------------------|------------------|
| 1POK<br>(E239Y)               | MIDYTAAGFTLLQGAHLYAPEDRGICDVLVANGKIIAVASNIP<br>SDIVPNCTVVDLSGQILCPGFIDQHVHLIGGGGEAGPTTRTPE<br>VALSRLTEAGVTSVVGLLGTDSSISRHPESLLAKTRALNEEGIS<br>AWMLTGAYHVPSRTITGSVEKDVAIIDRVIGVKCAISDHRS<br>APDVYHLANMAAESRVGGLLGGKPGVTVFHMGDSKKALQPI<br>YDLLENCVDPISKLLPTHVNRNVPLFYQALEFARKGGTIDITS<br>SIDEPVAPAEGIARAVQAGIPLARVTLSSDGNGSQPFFDDEGN<br>LTHIGVAGFETLLETVQVLVKDYDFSISDALRPLTSSVAGFLN<br>LTGKGEILPGNDADLLVMTPELRIEQVYARGKLMVKDGGKAC<br>VKGTFETA | 1                |
| Maltose<br>binding<br>protein | KIEEGKLVWINGDKGYNGLAEVGGKFEKDTGIKVTVEHPDK<br>LEEKFPQVAATGDGPDIIIFWAHDRFGGYAQSGLLAEITPDKAF<br>QDKLYPFTWDAVRYNGKLIAYPIAVEALSIIYNKDLLPNPPK                                                                                                                                                                                                                                                                                                     | 2                |

|                            |                                                                                                                                                                                                                                                                                                   |   |
|----------------------------|---------------------------------------------------------------------------------------------------------------------------------------------------------------------------------------------------------------------------------------------------------------------------------------------------|---|
| (MBP tag)                  | TWEEIPALDKELKAKGKSALMFNLQEPYFTWPLIAADGGYAF<br>KYENKDYDIKDVGVNAGAKAGLTFLVDLIKNKHMNADTD<br>YSIAEAAFNKGETAMTINGPWAWSNIDTSKVNYGVTVLPTFK<br>GQPSKPFVGVLSAGINAASPNKELAKEFLENYLLTDEGLEAV<br>NKDKPLGAVALKSYEEELAKDPRIAATMENAQKGEIMPNIQ<br>MSAFWYAVRTAVINAASGRQTVDEALKDAQT                                 |   |
| HA (HA tag)                | YPYDVDPDYA                                                                                                                                                                                                                                                                                        |   |
| FLAG (FLAG tag)            | DYKDDDDK                                                                                                                                                                                                                                                                                          |   |
| V5 (V5 tag)                | GKPIPPLLGLDST                                                                                                                                                                                                                                                                                     |   |
| 1M3U (D157L, E158L, D161L) | MKPTTISLLQKYKQEKRFATITAYDYSFAKLFADGLNVMML<br>VGDSLGMTVQGHSTLPVTVADIA YHTAAVRRGAPNCLLLA<br>DLPFMAYATPEQAFENAATVMRAGANMVKIEGGEWL VETV<br>QMLTERAVPVC GHLGLTPQSVNIFGGYKVQGRGLLAGLQLL<br>SDALALEAAGAQLLVLECVVELAKRITEALAI PVIGIGAGNV<br>TDGQILVMHDAFGITGGHIPKFAKNFLAETGDIRAAVRQYMA<br>EVESGVYPGEEHSFH | 1 |
| 2CG4 (K126Y, D131Y)        | MENYLIDNLD RGILEALMGNARTAYAELAKQFGVSPETIHVR<br>VEKMKQAGIITGARIDVSPKQLGYDVGCFIGIILKSAKDYPSA                                                                                                                                                                                                        | 1 |

|                                     |                                                                                                                                                                                                                                                                                                                                                                                                                                                                                                                                                                                                                                                                                                                                                                                                                                                                         |   |
|-------------------------------------|-------------------------------------------------------------------------------------------------------------------------------------------------------------------------------------------------------------------------------------------------------------------------------------------------------------------------------------------------------------------------------------------------------------------------------------------------------------------------------------------------------------------------------------------------------------------------------------------------------------------------------------------------------------------------------------------------------------------------------------------------------------------------------------------------------------------------------------------------------------------------|---|
|                                     | LAKLES LDEVTEAYYTTGHYSIFIKVMCRSIDALQHVLINYIQ<br>TIYEIQSTETLIVLQNPIMRTIKP                                                                                                                                                                                                                                                                                                                                                                                                                                                                                                                                                                                                                                                                                                                                                                                                |   |
| 2VYC<br>(K491L,<br>D494L,<br>D497L) | MKVLIVESEFLHQDTWVGNAVERLADALSQQNVTVIKSTSFD<br>DGFAILSSNEAIDCLMFSYQMEHPDEHQNVRQLIGKLHERQQ<br>NVPVFL LGDREKALAAMDRDLELVDEF AWILED TADFIAGR<br>AVAAMTRYRQQLPPLFSALMKYS DIHEYSWAAPGHQGGVG<br>FTKTPAGRFYHDYYGENLFR TDMGIERTSLGSLLDHTGAFGE<br>SEKYAARVFGADRSWSVVVG TSGSNRTIMQACMTDNDVVV<br>VDRNCHKSIEQGLMLTGAKPVYMPVSRNRYGIIGPIYPQEMQ<br>PETLQKKISESPLTKDKAGQKPSYCVVTNCTYDGV CYNAKEA<br>QDLLEKTS DRLHFDEAWYGYARFNPIYADHYAMRGE PGDHN<br>GPTVFATHSTHKLLNALSQASYI HVREGRGAINFSRFNQAYM<br>MHATTSPLYAICASNDVA VSMMDGNSGLSLTQEVIDEAVDF<br>RQAMARLYKEFTADG SWFFKPWNKEVV TDPQTGLTYLFALA<br>PTKLLTTVQDCWVMHPGESWHGFKDIPDNWSMLDPIKVSIL<br>APGMGEDGELEETGVPAALVTA WLGRHGIVPTRTTDFQIMFL<br>FSMGVTRGKWGTLVNTLCSFKRHYDANTPLAQVMPELVEQ<br>YPTYANMGIHDLGDTMFAWLKENNPGARLNEAYSGLPVA<br>EVT PREAYNAIVDNNVELVSIENLPGRIAANSVIPYPPGIPMLL<br>SGENFGDKNSPQVSYLRSLQSWDHHFPGFEHETEGTEIIDGIY<br>HVMCVKA | 1 |
| DHF40                               | MSSEKEELRERLVKICVELAKLKGDDTLKAAEAAEEAFRLVV<br>LAAMLGIDSSEVLELAIRLIKTCVVLAAAMEGYDISEACRAA                                                                                                                                                                                                                                                                                                                                                                                                                                                                                                                                                                                                                                                                                                                                                                                | 3 |

|                        |                                                                                                                                                                                                                                                                                                                                                                                                                                               |   |
|------------------------|-----------------------------------------------------------------------------------------------------------------------------------------------------------------------------------------------------------------------------------------------------------------------------------------------------------------------------------------------------------------------------------------------------------------------------------------------|---|
|                        | AEAFTRVAMAALRAGITSSLVLKAAIELIKECVLNAAVEGYDI<br>SEACRAAAEAFKRVAEAAK RAGITSLETLLRAIEEIRKRVEEA<br>QREGNDISEACRQA AEEFRKKA EELKRRGDV                                                                                                                                                                                                                                                                                                              |   |
| $\gamma$ PFD           | MVNEVIDINEAVRAYIAQIEGLRAEIGRLDATIATLRQSLATL<br>KSLKTLGEGKTVLVPVGSIAQVEMKVEKMDKVVVSVGQNIS<br>AELEYEEALKYIEDEIKKLLTFRLVLEQAIAELYAKIEDLIAEA<br>QQTSEEEKAE EEEENEKAE                                                                                                                                                                                                                                                                              | 4 |
| Top7                   | DIQVQVNIDDNGKNFDYTYTVTTESELQKVLNELKDYIKKQG<br>AKRVRISITARTKKEAEKFAAILIKVFAELGYNDINVTWDGDT<br>VTVEGQLE                                                                                                                                                                                                                                                                                                                                         | 5 |
| dTor_12x<br>31L        | GSSMASGISVEELLKLA KAAYYSGTTVEEAYKLAL KLGISVE<br>ELLKLAEAAAYYSGTTVEEAYKLAL KLGISVEELLKLA KAAYY<br>SGTTVEEAYKLAL KLGISVEELLKLA KAAYYSGTTVEEAYKL<br>AL KLGISVEELLKLAEAAAYYSGTTVEEAYKLAL KLGISVEELL<br>KLAKAAYYSGTTVEEAYKLAL KLGISVEELLKLAKAAYYSG<br>TTVEEAYKLAL KLGISVEELLKLAEAAAYYSGTTVEEAYKLAL<br>KLGISVEELLKLAKAAYYSGTTVEEAYKLAL KLGISVEELLKL<br>AKAAYYSGTTVEEAYKLAL KLGISVEELLKLAEAAAYYSGTTV<br>EEAYKLAL KLGISVEELLKLAKAAYYSGTTVEEAYKLAL KLG | 6 |
| ERT2-<br>iCre-<br>ERT2 | MAGDMRAANLWPSPLMIKRSKKNLALS LTADQMVSALLD<br>AEPPILYSEYDPTRPFSEASMMGLLTNLADRELVHMINWAKR<br>VPGFVDLTLHDQVHLL ECAWLEILMIGLVWRSMEHPVKLLF<br>APNLLDRNQGKCV EGMVEIFDMLLATSSRFRMMNLQGEEF                                                                                                                                                                                                                                                             | 7 |

|                                 |                                                                                                                                                                                                                                                                                                                                                                                                                                                                                                                                                                                                                                                                                                                                                                                                                                                                                                                                                                        |  |
|---------------------------------|------------------------------------------------------------------------------------------------------------------------------------------------------------------------------------------------------------------------------------------------------------------------------------------------------------------------------------------------------------------------------------------------------------------------------------------------------------------------------------------------------------------------------------------------------------------------------------------------------------------------------------------------------------------------------------------------------------------------------------------------------------------------------------------------------------------------------------------------------------------------------------------------------------------------------------------------------------------------|--|
|                                 | <p>VCLKSIILLNSGVYTFLSSTLKSLEEKDHIHRVLDKITDTLIHL<br/> MAKAGLTLQQHQRLAQLLLILSHIRHMSNKGMEHLYSMKC<br/> KNVVPLYDLLLEAADAHRLHAPTSRGGASVEETDQSHLATA<br/> GSTSSHSLQKYYITGEAEGFPATAVDNLLTVHQNLPALPVDA<br/> TSDEVKRNLMDFRDRQAFSEHTWKMLLSVCRSWAAWCKL<br/> NNRKWFPAEPEDVRDYLLYLQARGLAVKTIQQHLGQLNMLH<br/> RRSGLPRPSDSNAVSLVMRRIRKENVDAGERAKQALAFERTD<br/> FDQVRSLMENS DRCQDIRNLAFLGIA YNTLLRIA EIARIRVKDI<br/> SRTDGG RMLIHIGRTKTLVSTAGVEKALS LGVTKLVERWISV<br/> SGVADDPNNYLFCRVRKNGVAAPSATSQLSTRALEGIFEATH<br/> RLIYGAKDDSGQRYLAWSGHSARVGAARDMARAGVSIPEIM<br/> QAGGWTNVNIVMNYIRNLDSETGAMVRLLEDGDLEPSAGD<br/> MRAANLWPSPLMIKRSKNSLALS LTADQMVSALLDAEPPIL<br/> YSEYDPTRPFSEASMMGLLTNLADRELVHMINWAKRVPGFV<br/> DLTLHDQVHLLECAWLEILMIGLVWRSMEHPVKLLFAPNLLL<br/> DRNQGKCV EGMVEIFDMLLATSSRFRMMNLQGEEFVCLKSII<br/> LLNSGVYTFLSSTLKSLEEKDHIHRVLDKITDTLIHLMAKAGL<br/> TLQQHQRLAQLLLILSHIRHMSNKGMEHLYSMKCKNVVPL<br/> YDLLLEAADAHRLHAPTSRGGASVEETDQSHLATAGSTSSHS<br/> LQKYYITGEAEGFPATA</p> |  |
| <p>NLS<br/> (SV40<br/> NLS)</p> | <p>PKKKRKV</p>                                                                                                                                                                                                                                                                                                                                                                                                                                                                                                                                                                                                                                                                                                                                                                                                                                                                                                                                                         |  |

|          |                           |  |
|----------|---------------------------|--|
| Linker2  | GG                        |  |
| Linker3  | GSG                       |  |
| Linker4  | GSSG                      |  |
| Linker5  | GGGSG                     |  |
| Linker6  | GGSGGT                    |  |
| Linker7  | GGSGGTG                   |  |
| Linker8  | GGSGGTGG                  |  |
| Linker12 | GGSGGTGGSGGT              |  |
| Linker13 | GGSGGTGGSGGTG             |  |
| Linker14 | GGSGGTGGSGGTGG            |  |
| Linker18 | GGSGGTGGSGGTGGSGGT        |  |
| Linker24 | GGSGGTGGSGGTGGSGGTGGSGGT  |  |
| Linker25 | GGSGGTGGSGGTGGSGGTGGSGGTG |  |

**Supplementary Table 2** – constructs of self-assembly proteins tested in neurons in this study

| <b>Construct</b> (promoters are <u>underlined</u> )                           | <b>Resulted pattern of protein self-assembly</b> (in the cytosol unless noted otherwise) |
|-------------------------------------------------------------------------------|------------------------------------------------------------------------------------------|
| <u>UBC</u> -1POK(E239Y)-Linker25-HA-Linker3-MBP_tag<br>(also known as XRI-HA) | Fiber(s)                                                                                 |



|                                                     |                                                                                         |
|-----------------------------------------------------|-----------------------------------------------------------------------------------------|
| <u>UBC</u> -1POK(E239Y)-Linker12-gg-HA              | Unstructured aggregates and intertwined fibers                                          |
| <u>UBC</u> -1POK(E239Y)-Linker13-HA-mEGFP           | Fiber(s)                                                                                |
| <u>UBC</u> -1M3U(D157L,E158L,D161L)-Linker14-HA     | Unstructured aggregates (and intertwined fibers in a subset of cells)                   |
| <u>UBC</u> -HA-Linker14-2CG4(K126Y,D131Y)           | Uniform expression in the nucleus                                                       |
| <u>UBC</u> -2VYC(K491L,D494L,D497L)-Linker14-HA     | Nucleus-localized puncta and cytosol-localized puncta                                   |
| <u>CMV</u> -1POK(E239Y)-Linker8-HA                  | Unstructured aggregates and intertwined fibers                                          |
| <u>UBC</u> -1POK(E239Y)-Linker7-HA-Linker3-MBP_tag  | Fiber(s)                                                                                |
| <u>UBC</u> -HA-Linker3-MBP_tag-Linker18-1POK(E239Y) | Fiber(s)                                                                                |
| <u>UBC</u> -1POK(E239Y)-Linker5-HA-mEGFP            | Fibers (mostly) and puncta                                                              |
| <u>UBC</u> -mEGFP-HA-Linker12-1POK(E239Y)           | Fiber(s)                                                                                |
| <u>UBC</u> -1POK(E239Y)-Linker25-HA-g-mEGFP         | Fiber(s)                                                                                |
| <u>UBC</u> -1POK(E239Y)-Linker7-HA-Linker3-Top7     | Short fibers and puncta in the nucleus (mostly) and cytosol                             |
| <u>UBC</u> -1POK(E239Y)-Linker25-HA-gsg-Top7        | Unstructured aggregates and intertwined fibers in the cytosol; nucleus-localized fibers |

|                                                                  |                                                                                                  |
|------------------------------------------------------------------|--------------------------------------------------------------------------------------------------|
| <u>UBC</u> -1POK(E239Y)-Linker5-mEGFP-Linker2-HA-Linker3-MBP_tag | Puncta                                                                                           |
| <u>UBC</u> -1POK(E239Y)-Linker24-mEGFP-HA-Linker6-MBP            | Fiber(s) with large thickness                                                                    |
| <u>UBC</u> -1POK(E239Y)-Linker5-mEGFP-HA-Linker3-Top7            | Dense and small puncta                                                                           |
| <u>UBC</u> -Top7-Linker12-1POK(E239Y)-Linker13-HA-mEGFP          | Unstructured aggregates and fibers; high non-assembly background                                 |
| <u>UBC</u> -1POK(E239Y)-Linker24-mEGFP-HA-Linker6-Top7           | Unstructured aggregates and fibers in the cytosol; nucleus-localized fibers                      |
| <u>UBC</u> -HA-dTor_12x31L-Linker24-1POK(E239Y)                  | Puncta                                                                                           |
| <u>UBC</u> -NLS-Linker4-1POK(E239Y)-Linker13-HA-mEGFP            | Nucleus-localized fiber(s)                                                                       |
| <u>UBC</u> -NLS-Linker4-1POK(E239Y)-Linker14-HA                  | Nucleus-localized puncta                                                                         |
| <u>UBC</u> -DHF40-Linker14-HA                                    | Unstructured aggregates and intertwined fibers                                                   |
| <u>UBC</u> -DHF40-Linker13-HA-mEGFP                              | Unstructured aggregates, puncta, and intertwined fibers                                          |
| <u>UBC</u> -DHF58Four-Linker14-HA                                | Unstructured aggregates (and intertwined fibers in a subset of cells) in the cytosol and nucleus |

|                                               |                                                                                    |
|-----------------------------------------------|------------------------------------------------------------------------------------|
| <u>UBC</u> -DHF58Six-Linker14-HA              | Uniform expression in the nucleus, with dim unstructured aggregates in the cytosol |
| <u>UBC</u> -DHF58Six-Linker14-mRuby2_smFP(HA) | Uniform expression in the nucleus, with dim unstructured aggregates in the cytosol |
| <u>UBC</u> -DHF79-Linker14-HA                 | Uniform expression in the nucleus, with dim unstructured aggregates in the cytosol |
| <u>UBC</u> -DHF119-Linker14-HA                | Uniform expression in the nucleus, with dim unstructured aggregates in the cytosol |
| <u>CMV</u> -DHF40-Linker8-HA                  | Unstructured aggregates and intertwined fibers                                     |
| <u>CMV</u> -DHF46-Linker8-HA                  | Puncta                                                                             |
| <u>CMV</u> -DHF47-Linker8-HA                  | Unstructured aggregates and puncta                                                 |
| <u>CMV</u> -DHF50-Linker8-HA                  | Unstructured aggregates and puncta                                                 |
| <u>CMV</u> -DHF77-Linker8-HA                  | Unstructured aggregates and puncta                                                 |
| <u>UBC</u> - $\gamma$ PFD-Linker8-HA          | Puncta                                                                             |

## References

1. Garcia-Seisdedos, H., Empereur-Mot, C., Elad, N. & Levy, E. D. Proteins evolve on the edge of supramolecular self-assembly. *Nature* **548**, 244 (2017).
2. Kapust, R. B. & Waugh, D. S. Escherichia coli maltose-binding protein is uncommonly effective at promoting the solubility of polypeptides to which it is fused. *Protein Sci.* **8**, 1668–1674 (1999).
3. Shen, H. *et al.* De novo design of self-assembling helical protein filaments. *Science* **362**, 705 (2018).
4. Glover, D. J., Giger, L., Kim, S. S., Naik, R. R. & Clark, D. S. Geometrical assembly of ultrastable protein templates for nanomaterials. *Nat. Commun.* *2016 71* **7**, 1–9 (2016).
5. B, K. *et al.* Design of a novel globular protein fold with atomic-level accuracy. *Science* **302**, 1364–1368 (2003).
6. Doyle, L. *et al.* Rational design of  $\alpha$ -helical tandem repeat proteins with closed architectures. *Nature* **528**, 585–588 (2015).
7. T, M. & CL, C. Controlled expression of transgenes introduced by in vivo electroporation. *Proc. Natl. Acad. Sci. U. S. A.* **104**, 1027–1032 (2007).
